# Supplementary material for: Facile fabrication of an Au/Cu bimetallic nanocluster-based fluorescent composite film for sensitive and selective detection of Cr(vi)
Source: Royal Society of Chemistry journal article supplement (doi:10.1039/d3dt01068f), 2023-01-01
Supplement: d3dt01068f1.pdf [file d3dt01068f1.pdf]

# Supporting information

## Facile Fabrication of Au/Cu Bimetallic Nanoclusters Based Fluorescent Composite Film for Sensitive and Selective Detection of Cr(VI)

Xirui Miao<sup>a</sup>, Jinna Bai<sup>a</sup>, Yidan Liang<sup>a</sup>, Menglei Sun<sup>a</sup>, Yuanqing Sun<sup>\*b</sup>, Xudong Yang<sup>\*a</sup>

<sup>a</sup> School of Chemical Engineering, Advanced Institute of Materials Science, Changchun University of Technology, Changchun 130012, P. R. China.

<sup>b</sup> State Key Laboratory of Heavy Oil and Beijing Key Lab of Oil & Gas Optical Detection Technology, China University of Petroleum, Beijing 102249, P.R. China

*\*Corresponding authors:*

*E-mail addresses:* [yangxudong10@163.com](mailto:yangxudong10@163.com) (Xudong Yang),

[yqsun@cup.edu.cn](mailto:yqsun@cup.edu.cn) (Yuanqing Sun)

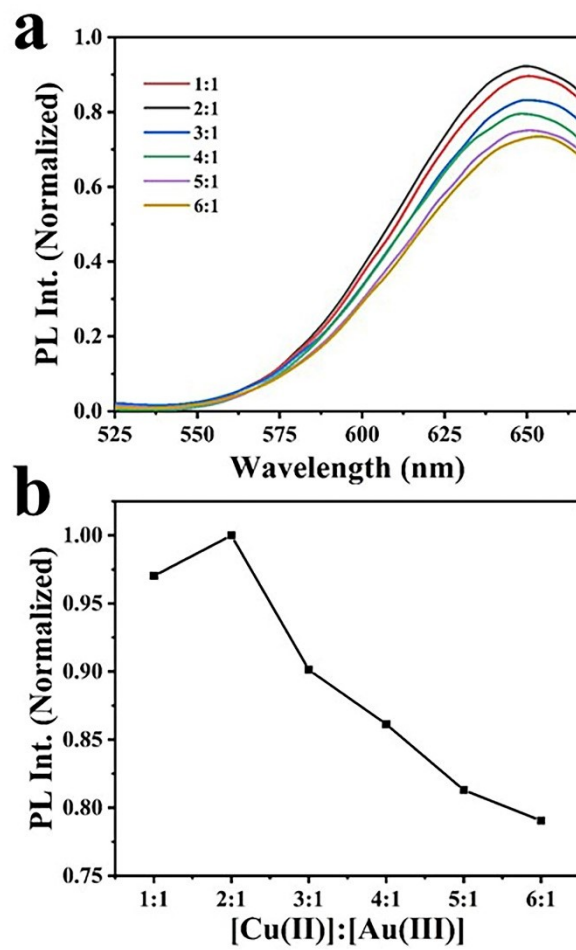

**Fig. S1.** (a) fluorescence spectra and (b) relative fluorescence intensity line graphs of DPA-Au/Cu NCs with different [Cu(II)]: [Au(III)] amount of substance ratios.

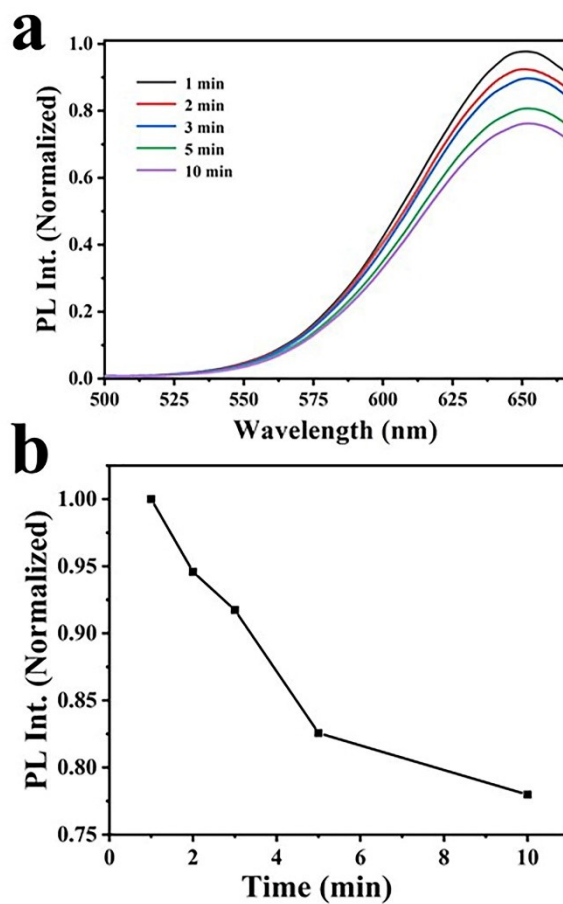

**Fig. S2.** (a) fluorescence spectra and (b) relative fluorescence intensity line graphs of DPA-Au/Cu NCs under different reaction time conditions.

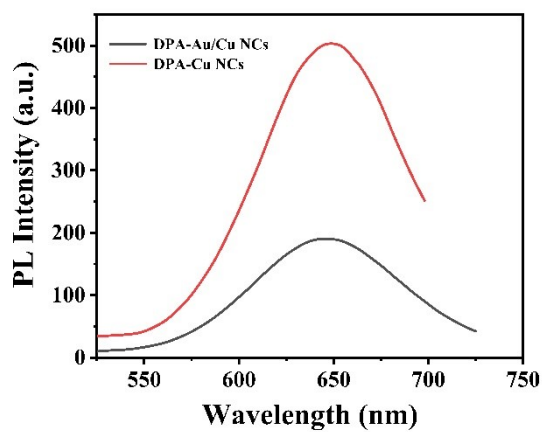

**Fig. S3.** Fluorescence spectra of DPA-Cu NCs and DPA-Au/Cu NCs.

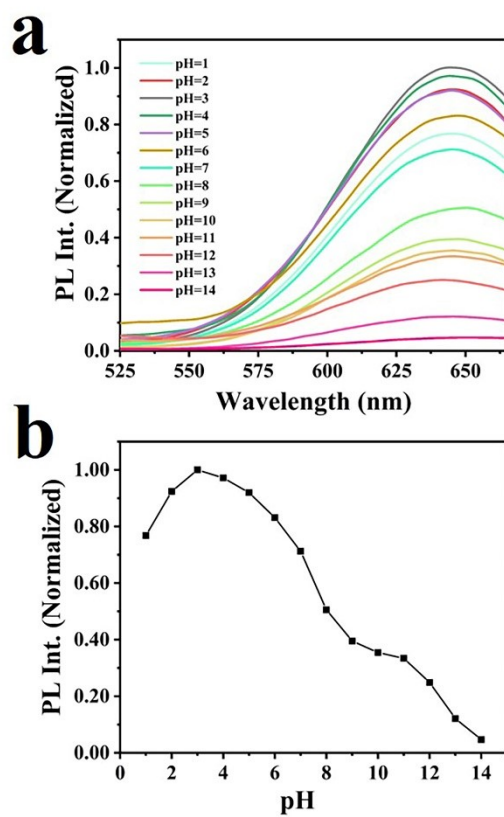

**Fig. S4.** (a) fluorescence spectra and (b) relative fluorescence intensity line graphs of DPA-Au/Cu NCs under different pH values.

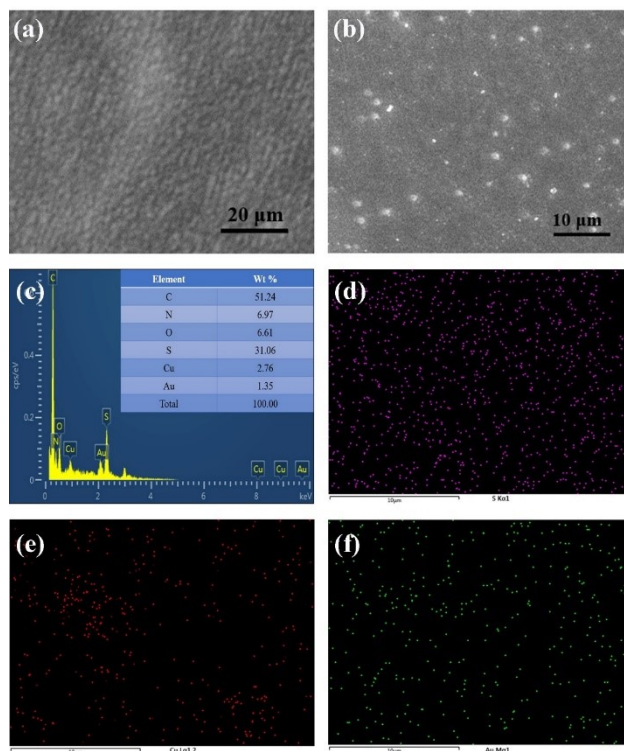

**Fig. S5.** (a) SEM image of CS film. (b) SEM image of DPA-Au/Cu NCs@CS fluorescent composite film. (c) EDS diagram of DPA-Au/Cu NCs@CS fluorescent composite film. (d-f) Elemental mapping of S, Cu, Au for DPA-Au/Cu NCs@CS fluorescent composite film.

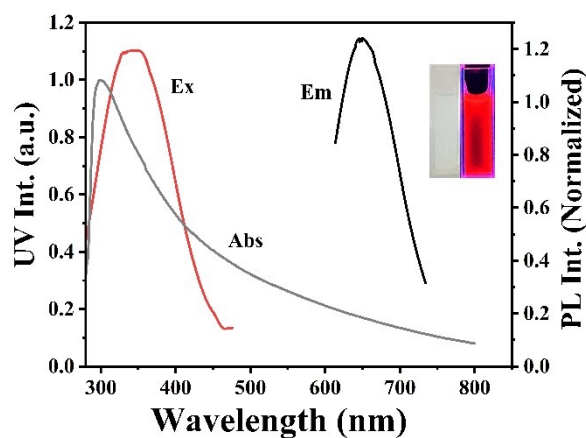

**Fig. S6.** Fluorescence excitation (Ex) and emission (Em) spectra of DPA-Au/Cu NCs plotted with UV absorption spectra (Abs); insets show the images of DPA-Au/Cu NCs in visible light (left) and under 365 nm UV light irradiation (right).

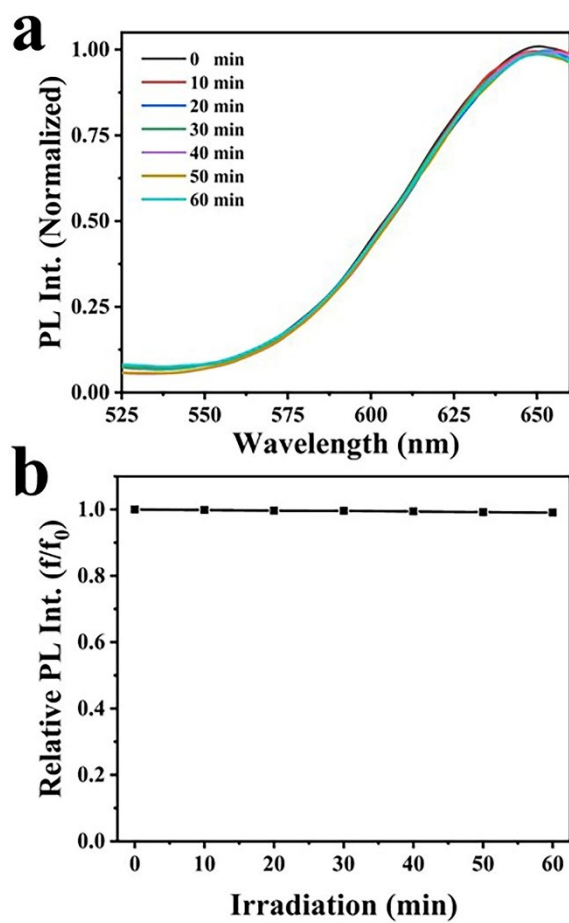

**Fig. S7.** DPA-Au/Cu NCs@CS at different times of UV lamp ( $\lambda=365$  nm) irradiation to (a) fluorescence emission spectra and (b) linear plots of relative fluorescence intensity.

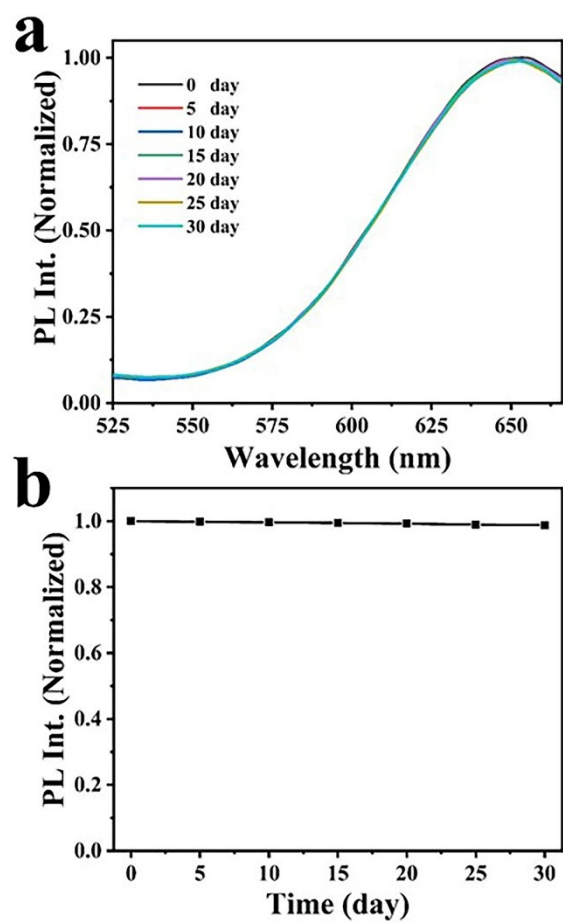

**Fig. S8.** DPA-Au/Cu NCs@CS placed at room temperature for different days corresponding to (a) fluorescence emission spectra and (b) linear plots of relative fluorescence intensity.

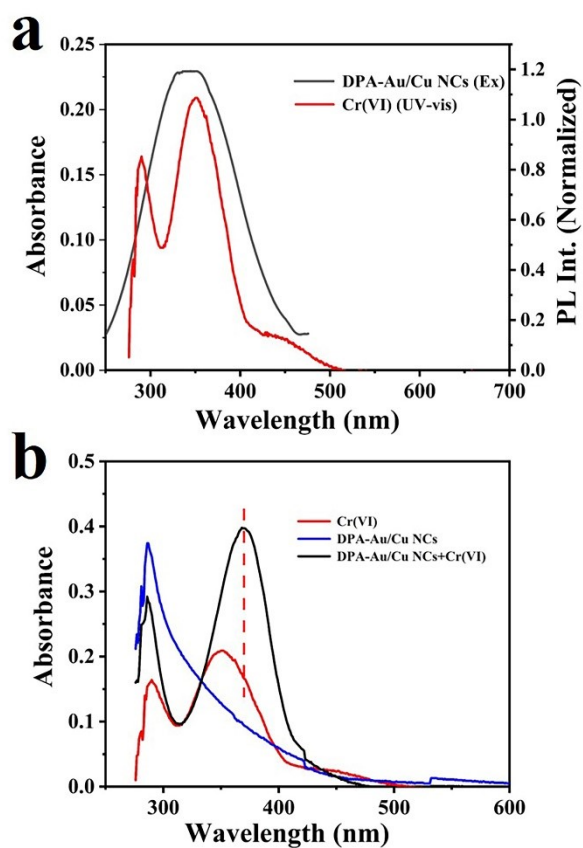

**Fig. S9.** (a) UV-vis absorption spectra of the Cr(VI) and fluorescence excitation spectra of the DPA-Au/Cu NCs; (b) UV-vis absorption spectra of the DPA-Au/Cu NCs, Cr(VI), and DPA-Au/Cu NCs with Cr(VI).



**Table S1. Sensing performance of different nanocluster fluorescent sensors for the detection of Cr(VI)**

| Nanoclusters sensors | Detection limits | Optimal emission wavelength | References |
|----------------------|------------------|-----------------------------|------------|
| Au NCs               | 7.2 ppb          | 480 nm                      | 1          |
| CA-Au/Cu NCs         | 23.53 ppb        | 436 nm                      | 2          |
| Cu NCs               | 0.03 mM          | 411 nm                      | 3          |
| Cu NCs               | 43 nM            | 490 nm                      | 4          |
| BSA-Ag NCs           | 2.32 nM          | 707 nm                      | 5          |
| Ir NCs               | 7.35 ppb         | 575 nm                      | 6          |
| BSA-Au NCs           | 0.6 nM           | 615 nm                      | 7          |
| Au/Ag NCs            | 0.3 $\mu$ M      | 610 nm                      | 8          |
| GSA-Au NCs           | 35.30 ppb        | 600 nm                      | 9          |
| PEI-Ag NCs           | 1.1 $\mu$ M      | 472 nm                      | 10         |
| DPA-Au/Cu            | 0.26 ppb         | 647 nm                      | This study |

1. F. Liu, X. Lai, S. Zhao, Z. Lu, P. Han and L. Chen, *Food Chem*, 2023, **402**, 134251.
2. M. Shellaiah, T. Simon, N. Thirumalaivasan, K. W. Sun, F. H. Ko and S. P. Wu, *Mikrochim Acta*, 2019, **186**, 788.
3. Y. S. Lin, T. C. Chiu and C. C. Hu, *RSC Adv*, 2019, **9**, 9228-9234.
4. M. Cui, G. Song, C. Wang and Q. Song, *Microchimica Acta*, 2015, **182**, 1371-1377.
5. Z. Yuan, Z. Li, X. Zhao, Z. Ding, M. Xia, X. Dong, P. Ni and Y. Lu, *Anal Bioanal Chem*, 2023, **415**, 1477-1485.
6. M. Cui, C. Wang, D. Yang and Q. Song, *Mikrochim Acta*, 2017, **185**, 8.
7. G. Jian-feng, H. Chang-jun, Y. Mei, H. Dan-qun and F. Huan-bao, *RSC Advances*, 2016, **6**, 104693-104698.
8. Y. Yang, Y. Sun, S. Liao, Z. Wu and R. Yu, *Analytical Methods*, 2016, **8**, 7237-7241.
9. Y. B. Yin, C. L. Conrad, K. N. Heck, F. Lejarza and M. S. Wong, *ACS Appl Mater Interfaces*, 2019, **11**, 17491-17500.
10. Q. Xue, X. Li, Y. Peng, P. Liu, H. Peng and X. Niu, *Mikrochim Acta*, 2020, **187**, 263.
